# Supplementary material for: Verification That Mouse Chromosome 14 Is Responsible for Susceptibility to Streptozotocin in NSY Mice
Source: Hindawi journal article supplement (doi:10.1155/2018/7654979), 2018-11-21

Supplemental Figure 1

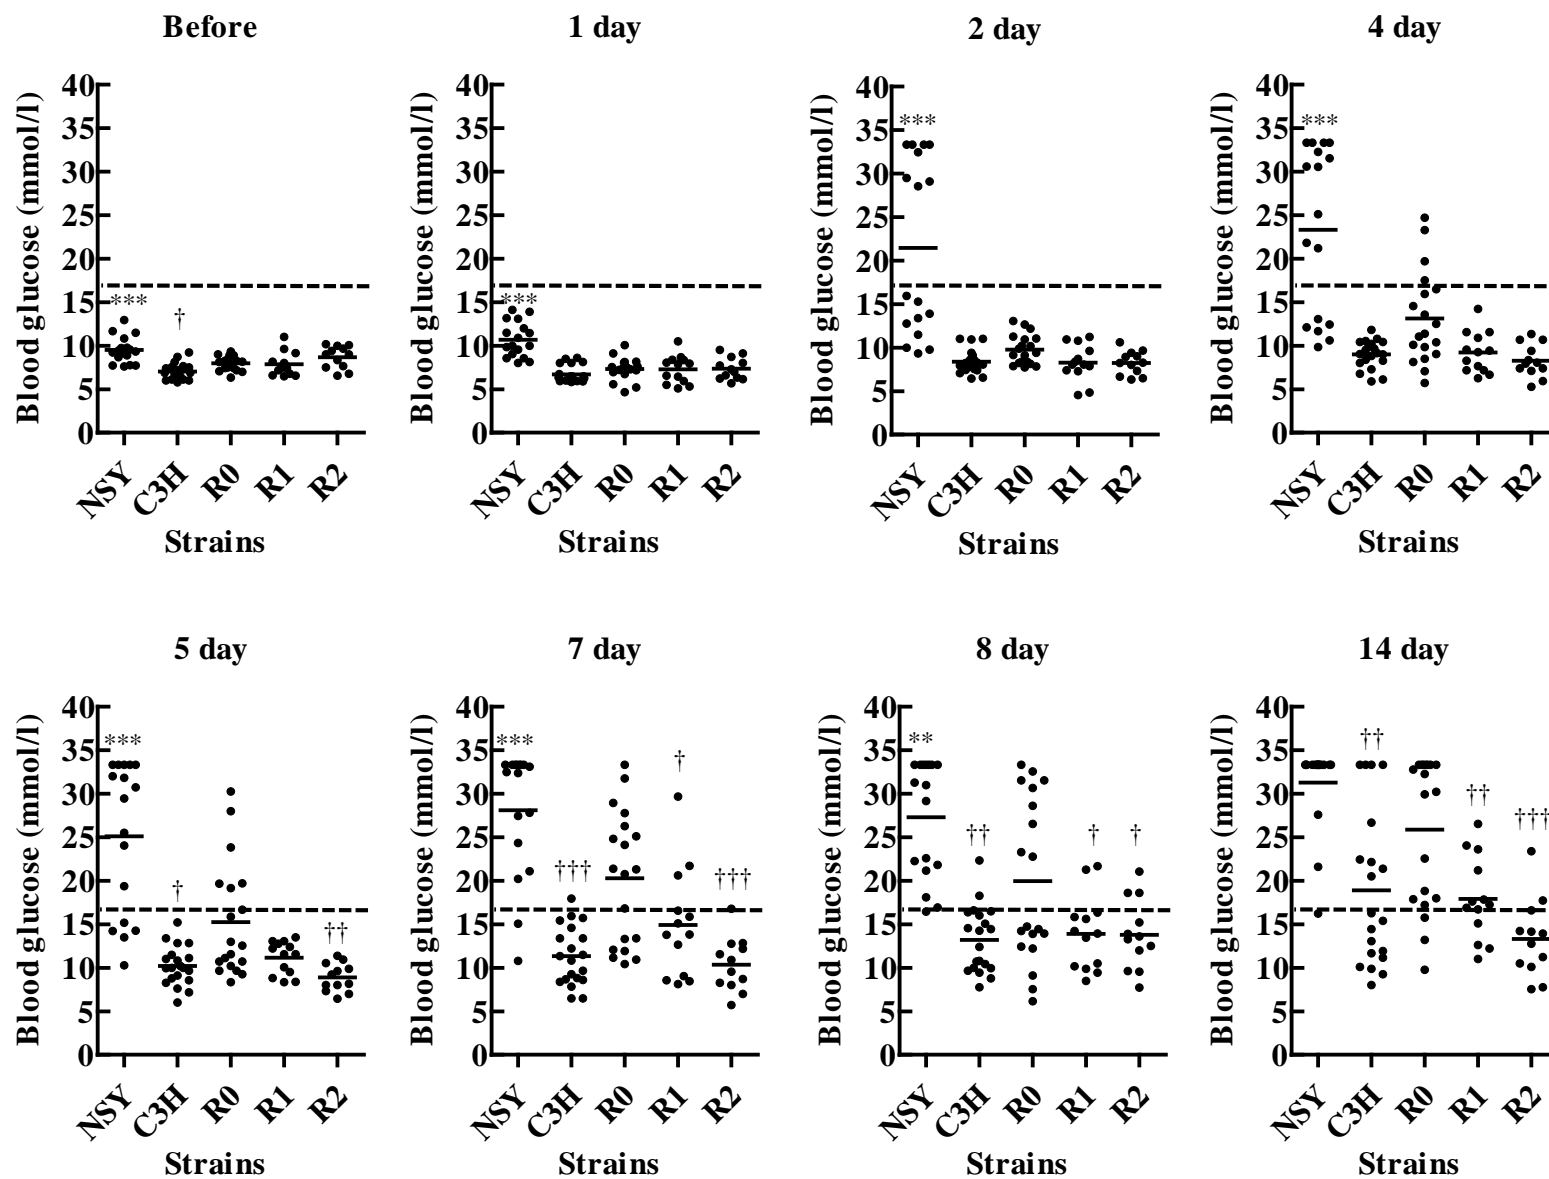

## Supplemental Figure 2

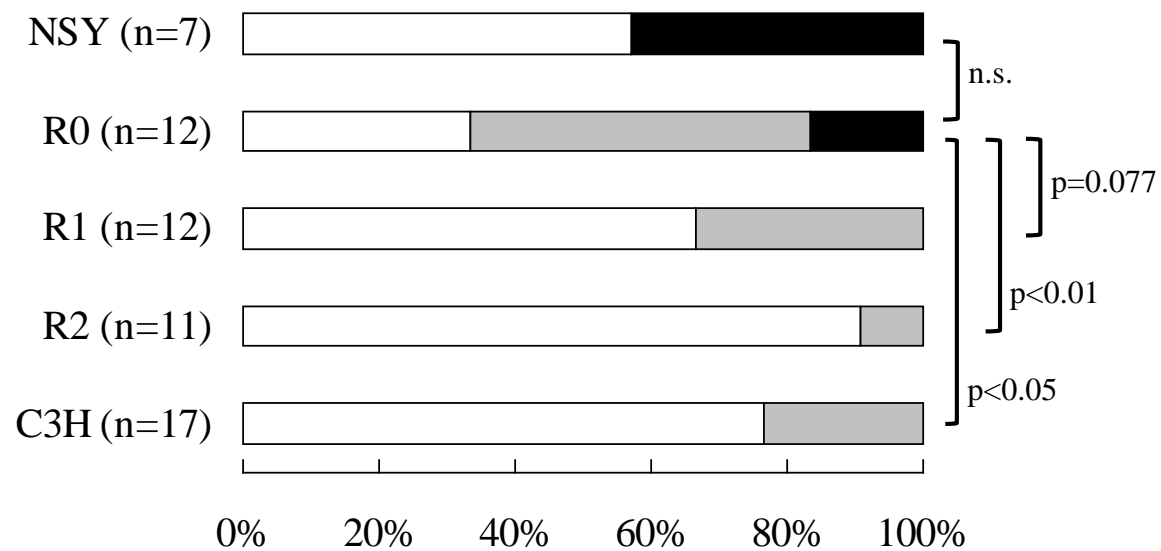

Supplement: f1 [file 7654979.f1.pdf]
